# Supplementary material for: Zinc-Doped Boron Phosphide Nanocluster as Efficient Sensor for SO2
Source: Hindawi journal article supplement (doi:10.1155/2020/2629596), 2020-02-23
Supplement: f1 [file 2629596.f1.pdf]

## Supporting Information

### Zinc doped boron phosphide nanocluster as efficient sensor for SO<sub>2</sub>

Shahid Hussain<sup>a</sup>, Shahzad Ali Shahid Chatha<sup>a</sup>, Abdullah Ijaz Hussain<sup>a</sup>, Riaz Hussain<sup>b</sup>, Muhammad Yasir Mehboob<sup>b</sup>, Shabbir Muhammad<sup>c,d</sup>, Zaheer Ahmad<sup>e</sup>, Khurshid ayub<sup>f\*</sup>

<sup>a</sup> *Department of Applied Chemistry, Government College University, Faisalabad – 38000, Pakistan.*

<sup>b</sup> *Department of Chemistry, University of Okara, Okara, Punjab, Pakistan.*

<sup>c</sup> *Department of Physics, College of Science, King Khalid University, Abha, Saudi Arabia*

<sup>d</sup> *Research Center for Advanced Materials Science (RCAMS), King Khalid University, Abha, Saudi Arabia*

<sup>e</sup> *Department of Chemistry, University of Wah, Wah, Pakistan*

<sup>f</sup> *Department of Chemistry, COMSATS Institute of Information Technology, Abbottabad, 22060, Pakistan*

### Corresponding Author

Khurshid Ayub

Tel: +92-992-383591

Fax: +92-992-383441

Email: [Khurshid@cuiatd.edu.pk](mailto:Khurshid@cuiatd.edu.pk)

### Cartesian Coordinates of the Optimized Structures

#### **B<sub>12</sub>P<sub>12</sub>**

| Symbol | X           | Y           | Z           |
|--------|-------------|-------------|-------------|
| B      | -2.43763300 | -1.17136700 | 0.00096900  |
| B      | -0.44854100 | -0.83308500 | -2.33606700 |
| B      | -0.44024500 | -2.61619000 | 0.00371300  |
| B      | -0.44798400 | -0.82507200 | 2.33877600  |
| B      | 2.14043500  | -1.78327200 | -1.17954200 |
| B      | 2.14040300  | -1.77963300 | 1.18463000  |
| B      | 3.06642000  | 0.80340700  | -0.00144000 |
| B      | 1.30317900  | 0.82134400  | 2.38080600  |
| B      | 1.30275900  | 0.81396400  | -2.38317500 |
| B      | 1.47432500  | 2.55724800  | -0.00395600 |
| B      | -1.24426200 | 1.93358000  | 1.14715800  |
| B      | -1.24456400 | 1.92981900  | -1.15248400 |
| P      | 1.39820600  | -3.11422200 | 0.00458900  |
| P      | 3.48008300  | -1.05991100 | 0.00142500  |
| P      | 1.42050900  | -1.06615600 | -2.79529900 |
| P      | -1.57383900 | -2.10191000 | -1.47675400 |
| P      | -1.57312700 | -2.09561900 | 1.48214200  |
| P      | -0.57833500 | 1.05583100  | -2.71492800 |
| P      | -2.70782600 | 1.57197900  | -0.00194000 |
| P      | -0.32521900 | 3.18047100  | -0.00482400 |
| P      | -0.57777500 | 1.06472400  | 2.71249600  |
| P      | 1.42098900  | -1.05755200 | 2.79848100  |
| P      | 2.55364400  | 1.94490500  | 1.46970700  |
| P      | 2.55339300  | 1.94044000  | -1.47601500 |

#### **B<sub>12</sub>P<sub>12</sub>-SO<sub>2</sub>**

| <b>Symbol</b> | <b>X</b>    | <b>Y</b>    | <b>Z</b>    |
|---------------|-------------|-------------|-------------|
| B             | -2.30816000 | -0.79794400 | 0.97362100  |
| B             | 0.24846100  | -1.29403800 | 2.36063600  |
| B             | -1.10331200 | 1.36872300  | 1.75743700  |
| B             | -1.35396800 | 1.86686400  | -1.00106900 |
| B             | 1.92755500  | 1.07805300  | 1.92675300  |
| B             | 1.19760900  | 2.59404400  | 0.24479700  |
| B             | 2.97976300  | 0.44037600  | -0.77167300 |
| B             | 0.61847700  | 1.30329700  | -2.33192700 |
| B             | 2.16614500  | -1.75949700 | 1.07455500  |
| B             | 1.85257200  | -1.34590700 | -1.85456900 |
| B             | -1.12827600 | -1.11423300 | -1.85080000 |
| B             | -0.38219000 | -2.65727400 | -0.27494800 |
| P             | 0.51167700  | 2.38552500  | 2.03252700  |
| P             | 2.96669400  | 1.86350800  | 0.50260300  |
| P             | 2.04052600  | -0.67951800 | 2.67056000  |
| P             | -1.39902100 | -0.36603200 | 2.56238200  |
| P             | -2.50855000 | 1.81100500  | 0.50337500  |
| P             | 0.62468600  | -2.89010200 | 1.34293800  |
| P             | -2.20260900 | -2.07206200 | -0.52876500 |
| P             | 0.27541400  | -2.40254700 | -2.06984500 |
| P             | -1.19033700 | 0.66850900  | -2.53381500 |
| P             | 0.22947400  | 2.92276500  | -1.35931300 |
| P             | 2.27710200  | 0.38945900  | -2.57372200 |
| P             | 3.20954000  | -1.45659000 | -0.49463100 |
| S             | 0.27557493  | 0.60974925  | 4.39312558  |
| O             | 1.62050158  | 0.23775841  | 4.83492500  |
| O             | -0.87623921 | -0.11965567 | 4.92574573  |

**B<sub>12</sub>P<sub>12</sub>-Zn (M1)**

| Symbol | X           | Y           | Z           |
|--------|-------------|-------------|-------------|
| B      | -2.00524000 | -2.15227400 | -0.00000900 |
| B      | -0.29642600 | -1.04502000 | -2.18236500 |
| B      | 0.32705900  | -2.87037800 | -0.00004600 |
| B      | -0.29641900 | -1.04512100 | 2.18232400  |
| B      | 2.51970100  | -1.27363200 | -1.16840500 |
| B      | 2.51970300  | -1.27367600 | 1.16835700  |
| B      | 2.79285500  | 1.46561300  | 0.00002500  |
| B      | 0.99989100  | 1.03483100  | 2.26375300  |
| B      | 0.99989000  | 1.03491800  | -2.26373000 |
| B      | 0.87872400  | 2.85140900  | 0.00005100  |
| B      | -1.82084800 | 1.76426500  | 1.04143400  |
| B      | -1.82084000 | 1.76431300  | -1.04138800 |
| P      | 2.22329800  | -2.77306000 | -0.00005100 |
| P      | 3.64743000  | -0.23699700 | -0.00000600 |
| P      | 1.55236600  | -0.75074100 | -2.73563900 |
| P      | -0.92641000 | -2.72136100 | -1.47585200 |
| P      | -0.92639900 | -2.72145700 | 1.47578700  |
| P      | -0.89253000 | 0.78753500  | -2.43256900 |
| P      | -3.41738900 | 1.56435200  | 0.00001300  |
| P      | -0.99741600 | 3.15989700  | 0.00005600  |
| P      | -0.89252700 | 0.78742700  | 2.43256400  |
| P      | 1.55237100  | -0.75084200 | 2.73561200  |
| P      | 2.02887000  | 2.44667400  | 1.48250300  |
| P      | 2.02886900  | 2.44672700  | -1.48241600 |
| Zn     | -3.28994100 | -0.66161900 | -0.00000100 |

**B<sub>12</sub>P<sub>12</sub>-Zn (M2)**

| <b>Symbol</b> | <b>X</b>    | <b>Y</b>    | <b>Z</b>    |
|---------------|-------------|-------------|-------------|
| B             | -0.49657900 | -0.52326300 | 2.41012100  |
| B             | 1.66089800  | -2.18172400 | 1.18212100  |
| B             | 1.63559100  | 0.52647800  | 2.43084000  |
| B             | -0.50667400 | 2.16912500  | 1.18230200  |
| B             | 3.28309700  | 0.01925800  | -0.00039800 |
| B             | 2.21789800  | 2.14656100  | 0.00115600  |
| B             | 1.63468300  | 0.52970300  | -2.43050100 |
| B             | -0.50699700 | 2.17078200  | -1.17909300 |
| B             | 1.66052300  | -2.18013200 | -1.18541100 |
| B             | -0.49734400 | -0.51995300 | -2.41053200 |
| B             | -2.39466200 | -0.00747000 | 0.00048600  |
| B             | -1.06560800 | -2.12759500 | -0.00103100 |
| P             | 3.11103200  | 1.26214400  | 1.46662700  |
| P             | 3.11042800  | 1.26398600  | -1.46569300 |
| P             | 3.15613100  | -1.88831400 | -0.00168200 |
| P             | 1.21681200  | -1.31466000 | 2.82294100  |
| P             | -0.08164800 | 1.31054300  | 2.83142400  |
| P             | 0.52416400  | -3.19513200 | -0.00212300 |
| P             | -1.95977100 | -1.27082200 | 1.46482600  |
| P             | -1.96014000 | -1.26886200 | -1.46554300 |
| P             | -1.99261100 | 1.89651300  | 0.00170200  |
| P             | 0.62316700  | 3.19897400  | 0.00207200  |
| P             | -0.08252400 | 1.31438300  | -2.82950500 |
| P             | 1.21589100  | -1.31094400 | -2.82497400 |
| Zn            | -4.54460300 | -0.00253200 | -0.00004600 |

**B<sub>12</sub>P<sub>12</sub>-Zn (M3)**

| <b>Symbol</b> | <b>X</b> | <b>Y</b> | <b>Z</b> |
|---------------|----------|----------|----------|
|---------------|----------|----------|----------|

|    |             |             |             |
|----|-------------|-------------|-------------|
| B  | 0.36433900  | -2.78887700 | 0.02641800  |
| B  | 2.82438600  | -1.19956300 | -0.62873300 |
| B  | 1.36179500  | -1.67586000 | 1.89501600  |
| B  | -1.65768000 | -1.10213500 | 1.35546900  |
| B  | 2.58853800  | 1.00174000  | 1.39007900  |
| B  | 0.46292400  | 1.08022500  | 2.27706300  |
| B  | 0.68948100  | 2.85727000  | -0.06665500 |
| B  | -2.09286800 | 1.77325400  | 0.57532600  |
| B  | 2.43997100  | 0.93287900  | -1.57499300 |
| B  | -0.49827300 | 1.77281400  | -1.69449200 |
| B  | -1.75615400 | -1.37103600 | -1.17902800 |
| B  | 0.46864300  | -1.12577600 | -2.31875700 |
| P  | 1.88252700  | -0.09029300 | 2.81419500  |
| P  | 1.49787100  | 2.57118600  | 1.64079200  |
| P  | 3.62991800  | 0.48528300  | -0.13116500 |
| P  | 2.24134900  | -2.63881700 | 0.48637100  |
| P  | -0.38184000 | -2.49227900 | 1.78519800  |
| P  | 2.33893800  | -0.77895400 | -2.45290300 |
| P  | -0.44908000 | -2.72008200 | -1.70214900 |
| P  | -1.03600200 | 0.05119800  | -2.33152600 |
| P  | -3.09826400 | -1.72021700 | 0.16322200  |
| P  | -1.37248900 | 0.71606200  | 1.96849300  |
| P  | -1.19436800 | 3.07602700  | -0.45579700 |
| P  | 1.31776200  | 2.45892800  | -1.81918500 |
| Zn | -3.55401200 | 0.51515500  | 0.00777500  |

**B<sub>12</sub>P<sub>12</sub>-Zn (M4)**

| <b>Symbol</b> | <b>X</b>    | <b>Y</b>    | <b>Z</b>   |
|---------------|-------------|-------------|------------|
| B             | -0.14256600 | -2.35320400 | 1.22612300 |

|    |             |             |             |
|----|-------------|-------------|-------------|
| B  | -2.84588900 | -1.09960700 | 1.20985300  |
| B  | -1.24229800 | -2.50066800 | -0.87547300 |
| B  | 1.45938400  | -1.26502400 | -1.03486600 |
| B  | -2.86809300 | -0.11072100 | -1.60046000 |
| B  | -0.76212200 | -0.19462500 | -2.70140500 |
| B  | -1.23191200 | 2.35203700  | -1.22525300 |
| B  | 1.46471800  | 1.09446200  | -1.20541400 |
| B  | -2.84038900 | 1.27085500  | 1.03853200  |
| B  | -0.13202800 | 2.50208400  | 0.87611400  |
| B  | 1.48910200  | 0.11054000  | 1.59769500  |
| B  | -0.61029600 | 0.19440400  | 2.69887600  |
| P  | -2.00418000 | -1.63978200 | -2.40014400 |
| P  | -1.99767800 | 1.28420700  | -2.61076400 |
| P  | -3.88001400 | 0.00795000  | 0.01496400  |
| P  | -1.99270000 | -2.77594000 | 0.88083300  |
| P  | 0.60694000  | -2.87850300 | -0.47256300 |
| P  | -2.51766800 | 0.19188000  | 2.60543800  |
| P  | 0.62536300  | -1.28528800 | 2.61084500  |
| P  | 0.63180000  | 1.64082000  | 2.40010200  |
| P  | 2.49605900  | -0.00766800 | -0.01322000 |
| P  | 1.14742900  | -0.19200600 | -2.60719100 |
| P  | 0.61913400  | 2.77536200  | -0.88016900 |
| P  | -1.98044000 | 2.87918700  | 0.47313600  |
| Zn | 5.50004200  | -0.00019800 | -0.00135400 |

**B<sub>12</sub>P<sub>12</sub>-Zn-SO<sub>2</sub> (N1)**

| <b>Symbol</b> | <b>X</b>    | <b>Y</b>    | <b>Z</b>   |
|---------------|-------------|-------------|------------|
| B             | 1.75738400  | -1.49929800 | 0.31003100 |
| B             | -0.47673300 | -0.81788900 | 2.31892600 |

|    |             |             |             |
|----|-------------|-------------|-------------|
| B  | -0.39464600 | -2.73599800 | 0.12186100  |
| B  | -0.02323100 | -0.92252400 | -2.12939700 |
| B  | -3.01760600 | -1.74799400 | 1.01408200  |
| B  | -2.78071900 | -1.80097100 | -1.32006800 |
| B  | -3.78461700 | 0.82554900  | -0.30083200 |
| B  | -1.74316700 | 0.76733600  | -2.41320300 |
| B  | -2.21139200 | 0.87267400  | 2.18049400  |
| B  | -2.21792300 | 2.59971500  | -0.18203100 |
| B  | 0.68817900  | 2.04990800  | -0.94974600 |
| B  | 0.47110300  | 2.10217100  | 1.18133200  |
| P  | -2.24075200 | -3.15051100 | -0.05498100 |
| P  | -4.22611100 | -1.02979300 | -0.30425300 |
| P  | -2.38918000 | -0.98929900 | 2.65314100  |
| P  | 0.63118000  | -2.24324400 | 1.69068700  |
| P  | 0.92924900  | -2.31574700 | -1.23066600 |
| P  | -0.35100400 | 1.08930600  | 2.59837900  |
| P  | 2.13531100  | 2.04068900  | 0.27576200  |
| P  | -0.45253200 | 3.29513900  | -0.01884300 |
| P  | 0.16378700  | 0.97207000  | -2.45652300 |
| P  | -1.83199300 | -1.11369100 | -2.83142400 |
| P  | -3.11275100 | 1.92288500  | -1.74359000 |
| P  | -3.41222100 | 1.99022000  | 1.19666400  |
| Zn | 3.13166200  | -0.04995100 | 0.42847200  |
| S  | 6.23566100  | -0.16542200 | -0.14803500 |
| O  | 5.04127500  | -0.06476900 | 0.79291200  |
| O  | 5.87143300  | -0.10254300 | -1.57518000 |

**B<sub>12</sub>P<sub>12</sub>-Zn-SO<sub>2</sub> (N<sub>2</sub>)**

**Symbol      X                  Y                  Z**

|    |             |             |             |
|----|-------------|-------------|-------------|
| B  | -0.13507700 | -0.01019200 | 2.46383300  |
| B  | -1.68162700 | 2.31021400  | 1.39708600  |
| B  | -2.47421900 | -0.40719100 | 2.34218800  |
| B  | -0.83171000 | -2.45611200 | 0.95042600  |
| B  | -3.80639500 | 0.79202800  | -0.03732900 |
| B  | -3.38703800 | -1.53698300 | -0.25703700 |
| B  | -2.27173600 | 0.08439300  | -2.49221900 |
| B  | -0.73559200 | -2.21882400 | -1.41321800 |
| B  | -1.58196700 | 2.54831600  | -0.95658500 |
| B  | 0.06547400  | 0.47565700  | -2.33904900 |
| B  | 1.58248000  | -0.77000800 | 0.02593800  |
| B  | 0.97377400  | 1.61815800  | 0.24844600  |
| P  | -4.05500600 | -0.59057900 | 1.28673000  |
| P  | -3.93236000 | -0.29352600 | -1.62815500 |
| P  | -3.14744500 | 2.57366100  | 0.17098000  |
| P  | -1.57167400 | 1.18877700  | 2.93840000  |
| P  | -1.06542300 | -1.68458600 | 2.67748100  |
| P  | -0.25935900 | 3.07791500  | 0.34412800  |
| P  | 1.51866800  | 0.39032700  | 1.62298700  |
| P  | 1.63477400  | 0.68723100  | -1.29327100 |
| P  | 0.71709500  | -2.49209700 | -0.18559300 |
| P  | -2.15172100 | -2.99195900 | -0.35308100 |
| P  | -0.83116200 | -1.11270100 | -2.96222800 |
| P  | -1.33555200 | 1.75970200  | -2.67777900 |
| Zn | 3.68425400  | -1.36711200 | 0.05560200  |
| S  | 5.54465400  | 0.78406600  | 0.31111500  |
| O  | 4.58449700  | 1.85861700  | 0.00292300  |
| O  | 6.58594900  | 0.47120400  | -0.68008200 |

**B<sub>12</sub>P<sub>12</sub>-Zn-SO<sub>2</sub> (N3)**

| <b>Symbol</b> | <b>X</b>    | <b>Y</b>    | <b>Z</b>    |
|---------------|-------------|-------------|-------------|
| B             | 0.36433900  | -2.78887700 | 0.02641800  |
| B             | 2.82438600  | -1.19956300 | -0.62873300 |
| B             | 1.36179500  | -1.67586000 | 1.89501600  |
| B             | -1.65768000 | -1.10213500 | 1.35546900  |
| B             | 2.58853800  | 1.00174000  | 1.39007900  |
| B             | 0.46292400  | 1.08022500  | 2.27706300  |
| B             | 0.68948100  | 2.85727000  | -0.06665500 |
| B             | -2.09286800 | 1.77325400  | 0.57532600  |
| B             | 2.43997100  | 0.93287900  | -1.57499300 |
| B             | -0.49827300 | 1.77281400  | -1.69449200 |
| B             | -1.75615400 | -1.37103600 | -1.17902800 |
| B             | 0.46864300  | -1.12577600 | -2.31875700 |
| P             | 1.88252700  | -0.09029300 | 2.81419500  |
| P             | 1.49787100  | 2.57118600  | 1.64079200  |
| P             | 3.62991800  | 0.48528300  | -0.13116500 |
| P             | 2.24134900  | -2.63881700 | 0.48637100  |
| P             | -0.38184000 | -2.49227900 | 1.78519800  |
| P             | 2.33893800  | -0.77895400 | -2.45290300 |
| P             | -0.44908000 | -2.72008200 | -1.70214900 |
| P             | -1.03600200 | 0.05119800  | -2.33152600 |
| P             | -3.09826400 | -1.72021700 | 0.16322200  |
| P             | -1.37248900 | 0.71606200  | 1.96849300  |
| P             | -1.19436800 | 3.07602700  | -0.45579700 |
| P             | 1.31776200  | 2.45892800  | -1.81918500 |
| Zn            | -3.55401200 | 0.51515500  | 0.00777500  |
| S             | -8.00222414 | 0.41632391  | 0.02530978  |

|   |             |             |             |
|---|-------------|-------------|-------------|
| O | -8.89180622 | -0.73733978 | -0.11644837 |
| O | -8.58181117 | 1.75876087  | 0.09113864  |

**B<sub>12</sub>P<sub>12</sub>-Zn-SO<sub>2</sub> (N4)**

| <b>Symbol</b> | <b>X</b>    | <b>Y</b>    | <b>Z</b>    |
|---------------|-------------|-------------|-------------|
| B             | -0.14256600 | -2.35320400 | 1.22612300  |
| B             | -2.84588900 | -1.09960700 | 1.20985300  |
| B             | -1.24229800 | -2.50066800 | -0.87547300 |
| B             | 1.45938400  | -1.26502400 | -1.03486600 |
| B             | -2.86809300 | -0.11072100 | -1.60046000 |
| B             | -0.76212200 | -0.19462500 | -2.70140500 |
| B             | -1.23191200 | 2.35203700  | -1.22525300 |
| B             | 1.46471800  | 1.09446200  | -1.20541400 |
| B             | -2.84038900 | 1.27085500  | 1.03853200  |
| B             | -0.13202800 | 2.50208400  | 0.87611400  |
| B             | 1.48910200  | 0.11054000  | 1.59769500  |
| B             | -0.61029600 | 0.19440400  | 2.69887600  |
| P             | -2.00418000 | -1.63978200 | -2.40014400 |
| P             | -1.99767800 | 1.28420700  | -2.61076400 |
| P             | -3.88001400 | 0.00795000  | 0.01496400  |
| P             | -1.99270000 | -2.77594000 | 0.88083300  |
| P             | 0.60694000  | -2.87850300 | -0.47256300 |
| P             | -2.51766800 | 0.19188000  | 2.60543800  |
| P             | 0.62536300  | -1.28528800 | 2.61084500  |
| P             | 0.63180000  | 1.64082000  | 2.40010200  |
| P             | 2.49605900  | -0.00766800 | -0.01322000 |
| P             | 1.14742900  | -0.19200600 | -2.60719100 |
| P             | 0.61913400  | 2.77536200  | -0.88016900 |
| P             | -1.98044000 | 2.87918700  | 0.47313600  |

|    |            |             |             |
|----|------------|-------------|-------------|
| Zn | 5.50004200 | -0.00019800 | -0.00135400 |
| S  | 7.89681300 | -0.01917965 | -0.40398505 |
| O  | 8.62174034 | 1.24610343  | -0.27776833 |
| O  | 8.65426059 | -1.26018369 | -0.57302257 |
